## The Alkyl Chain Dependence of the Effect of Normal Alcohols on Agonist-induced Nicotinic Acetylcholine Receptor Desensitization Kinetics

Douglas E. Raines, M.D.,\* Vinu T. Zachariah, B.S.†

**Background:** The nAChR is the prototypical member of a superfamily of ligand-gated ion channels that are all relevant targets of anesthetics and undergo desensitization upon prolonged exposure to agonist. This study was designed to investigate the effects of representative normal alcohols on the apparent rate of acetylcholine-induced nAChR desensitization.

**Methods:** Nicotinic acetylcholine receptors were obtained from the electroplax organ of *Torpedo nobiliana*. The apparent rate of acetylcholine-induced desensitization in the presence and absence of normal alcohols was measured using stopped-flow fluorescence.

**Results:** Normal alcohols as long as octanol (the longest studied) increased the apparent rate of desensitization induced by low concentrations of acetylcholine, shifting the agonist concentration-response curve for desensitization to the left. Ethanol, butanol, and, to a lesser extent, hexanol increased the maximal rate of desensitization induced by high, saturating concentrations of agonist. Beyond hexanol, heptanol and octanol had no effect on this maximal apparent rate of desensitization, even at concentrations that approach those that directly induce desensitization in the absence of agonist.

**Conclusion:** Normal alcohols ranging from ethanol to octanol increase the apparent affinity of nAChR for agonist with potencies that are proportional to their hydrophobicities. However, normal alcohol effects on the rate constant for desensitization show a cutoff beyond hexanol. This suggests that the effects of normal alcohols on the apparent agonist affinity and rate constant for desensitization of nAChR may be modulated by distinct sites that have different steric constraints; the site(s) responsible for increasing the maximal rate of desensitization are predicted to be smaller than those that increase the appar-

ent agonist affinity. (Key words: Activation; anesthetic mechanism; cutoff; ion channel; *Torpedo*.)

THE nicotinic acetylcholine receptor (nAChR) is the prototypical member of a structurally and functionally related superfamily of ligand-gated ion channels that also includes the  $\gamma$ -aminobutyric acid<sub>A</sub>, glycine, and 5-hydroxytryptamine<sub>3</sub> receptors.<sup>1-3</sup> Members of this superfamily play a critical role in neuronal synaptic transmission and are considered to be important targets of alcohols and other compounds that possess general anesthetic activity.<sup>4</sup> In particular, the nAChR from *Torpedo* is considered a useful model for studying the molecular mechanism of anesthetic action on ligand-gated ion channels because its structure and function are far better defined than any other superfamily member.<sup>5-8</sup> In fact, current structural and functional (kinetic) models of the other ligand-gated ion channels have been derived, in large part, by assuming similarity to the nAChR.

Electrophysiologic and ion flux studies have shown that the binding of two acetylcholine molecules to the nAChR rapidly leads to channel opening and ion flux.<sup>9,10</sup> However, upon prolonged exposure to agonist, the nAChR undergoes a slowly reversible transition to a desensitized conformational state that cannot be opened even by saturating concentrations of agonist.<sup>10-12</sup> This conformational transition, referred to as desensitization, is not unique to the nAChR because it has been observed in all other members of the ligand-gated ion channel superfamily, where it may represent an important mechanism by which synaptic transmission is modulated.<sup>13-16</sup>

Although normal alcohols (n-alcohols) are not used clinically, they have been widely used in mechanistic studies of anesthetic action because they form a homologous series that allows one to assess the role that molecular structure plays in defining anesthetic activity.<sup>17-20</sup> Such studies have shown that some of the actions of n-alcohols on ligand-gated ion channels vary

\* Assistant Professor of Anaesthesia, Harvard Medical School, Boston, Massachusetts; Assistant Anesthetist, Massachusetts General Hospital.

† Research Assistant, Massachusetts General Hospital.

Received from the Department of Anesthesia and Critical Care, Massachusetts General Hospital, Boston, Massachusetts. Submitted for publication November 11, 1998. Accepted for publication March 1, 1999. Supported in part by a FIRST award from the National Institutes of General Medical Sciences (GM53481).

Address reprint requests to Dr. Raines: Department of Anesthesia, Massachusetts General Hospital, 32 Fruit Street, Boston, Massachusetts 02114. Address electronic mail to: Raines@etherdome.MGH.harvard.edu

with their alkyl chain lengths, with potencies that are not simply proportional to their hydrophobicities. For example, rapid quench-flow studies indicate that although short-chain *n*-alcohols potentiate ion flux induced by low concentrations of agonist, *n*-alcohols longer than butanol do not.<sup>21,22</sup> Conversely, long-chain *n*-alcohols block ion flux through the nAChOR open state, whereas short-chain *n*-alcohols do not.<sup>21,23</sup> Studies of the 5-hydroxytryptamine<sub>3</sub> receptor have shown that only short-chain *n*-alcohols potentiate ion flux induced by low agonist concentrations.<sup>24</sup> The inactivity of longer-chain members of a homologous series of *n*-alcohols is termed "cutoff" and has been cited as evidence of the existence of *n*-alcohol binding sites having limited dimensions on proteins.<sup>25,26</sup>

In this study, we quantitated the effects of representative *n*-alcohols on the apparent rate of nAChOR desensitization induced by a wide range of acetylcholine concentrations to determine whether a cutoff is observed for anesthetic actions on nAChOR desensitization kinetics. We used a stopped-flow fluorescence assay that measures desensitization rates even in the presence of *n*-alcohols that block ion flux. We determined that *n*-alcohols as long as octanol (the longest *n*-alcohol studied) increase the apparent rate of desensitization induced by low concentrations of acetylcholine, shifting the agonist concentration-response curve for desensitization to the left. This is indicative of an *n*-alcohol-induced increase in the apparent affinity of nAChOR for agonist. Our studies also showed that ethanol, butanol, and, to a lesser extent, hexanol increased the rate of desensitization induced by high, saturating concentrations of agonist. However, beyond hexanol, we observed a cutoff in the ability of *n*-alcohols to increase the maximal rate of desensitization. Our results are discussed in terms of current kinetic models that describe the actions of anesthetic compounds on nAChOR conformational transitions.

## Materials

*Torpedo nobiliana* was obtained from Biofish Associates (Georgetown, MA). Diisopropylfluorophosphate, acetylcholine, carbamylcholine, and *n*-alcohols were purchased from Sigma Chemical Co. (St. Louis, MO). The fluorescent partial agonist, [1-(5-dimethylaminonaphthalene)sulfonamido] *n*-hexanoic acid  $\beta$ -(*N*-trimethylammonium bromide) ethyl ester (Dns-C<sub>6</sub>-Cho), was synthesized according to the procedure of Waksman *et al.*<sup>27</sup>

## Methods

### *Preparation and Characterization of nAChOR-rich Membranes*

Receptor membranes were obtained from freshly dissected *Torpedo nobiliana* electric organs and prepared using sucrose density gradient centrifugation, essentially as described by Braswell *et al.*<sup>28</sup> Membranes were stored in *Torpedo* physiologic solution (250 mM NaCl, 5 mM KCl, 3 mM CaCl<sub>2</sub>, 2 mM MgCl<sub>2</sub>, 5 mM NaH<sub>2</sub>PO<sub>4</sub>, and 0.02% NaN<sub>3</sub>, pH 7.0) at -80°C and thawed on the day of use. Acetylcholinesterase activity was inhibited by exposing membranes to 3.0 mM diisopropylfluorophosphate for 30 min before dilution to the desired receptor concentration. The number of agonist binding sites was determined from Dns-C<sub>6</sub>-Cho titrations.<sup>29</sup>

### *Determination of the Apparent Rate of Agonist-induced Desensitization*

The apparent rate of agonist-induced desensitization was determined with a double-agonist pulse assay using a sequential mixing stopped-flow spectrofluorometer (Applied Photophysics, Leatherhead, England) as previously described.<sup>30</sup> In brief, receptor-rich membranes were first preincubated with acetylcholine for periods ranging from 15 ms to several minutes. The number of receptors able to be activated (nondesensitized) that remained after this preincubation period was then quantitated from the amplitude of the rapid fluorescence signal observed when the membrane/acetylcholine solution was rapidly mixed with the fluorescent partial agonist Dns-C<sub>6</sub>-Cho and high, channel-activating concentrations of acetylcholine. This rapid fluorescence signal reflects the binding of Dns-C<sub>6</sub>-Cho to the agonist self-inhibitory site on open state receptors and the conformational transition that follows.<sup>29</sup> In each experiment, receptor membranes (0.8  $\mu$ M agonist binding sites) were loaded into one of the premix syringes of the spectrofluorometer, and acetylcholine was loaded into the other premix syringe. The solutions were rapidly mixed (1 ms mixing time; 1:1, vol:vol) and allowed to preincubate for the desired time. The nAChOR/acetylcholine solution was then mixed (1 ms mixing time; 1:1, vol:vol) with a solution containing 10 mM acetylcholine and 20  $\mu$ M Dns-C<sub>6</sub>-Cho, and the fluorescence emission was recorded. Where appropriate, all of these solutions also contained the desired *n*-alcohol. An excitation wavelength of 290 nm was provided by a 150-watt xenon arc lamp, and the monochromator bandpass was 5 nm. Fluorescence emission greater than 500 nm was measured through a high

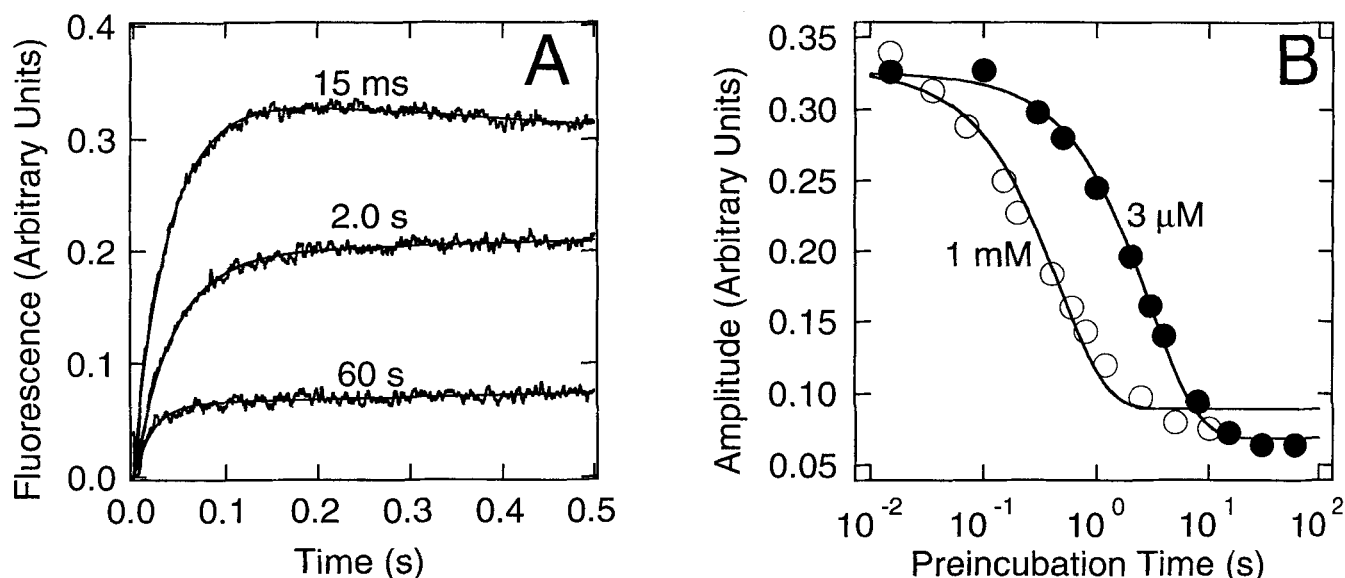

Fig. 1. The effect of acetylcholine-induced desensitization on the amplitude of the fast fluorescence component. (A) Fluorescence traces obtained when nAChR membranes are preincubated with 3  $\mu\text{M}$  acetylcholine (final concentrations after mixing) for the indicated times and then rapidly mixed with 5 mM acetylcholine and 10  $\mu\text{M}$  Dns- $\text{C}_6\text{-Cho}$  (final concentrations). The amplitude of the fast fluorescent component was 0.341, 0.197, and 0.064 (arbitrary units) upon preincubation for 15 ms, 2 s, and 60 s, respectively. (B) The amplitude of the fast fluorescent component as a function of preincubation time is plotted using preincubating acetylcholine concentrations of either 3  $\mu\text{M}$  or 1 mM. The curves are fits of the data to an exponential equation to derive the apparent rates of acetylcholine-induced desensitization. Acetylcholine at concentrations of 3  $\mu\text{M}$  and 1 mM induced desensitization with apparent rates of  $0.34 \pm 0.02 \text{ s}^{-1}$  and  $2.2 \pm 0.3 \text{ s}^{-1}$ , respectively.

pass filter. Fluorescence intensity was recorded for 500 ms after the second mixing step. In a typical experiment, three to five individual runs were signal averaged to reduce noise. All experiments were performed at  $20 \pm 0.3^\circ\text{C}$ .

#### Statistical Analysis

Experiments were performed using five separate preparations, and the effects of each n-alcohol were studied using at least two preparations. Data points on agonist concentration-apparent desensitization rate curves were fit to a Hill equation in the form:

$$k_{\text{app}} = k_{\text{max}} \cdot \left( \frac{[\text{Agonist}]^n}{[\text{Agonist}]^n + (K_d^{\text{app}})^n} \right) \quad (1)$$

where  $k_{\text{app}}$  is the experimentally determined apparent rate of desensitization,  $k_{\text{max}}$  is the maximum apparent rate of desensitization induced by high agonist concentrations,  $K_d^{\text{app}}$  is the agonist's apparent  $K_d$  for desensitization, and  $n$  is the Hill coefficient. The reported errors for the fitted parameters are the standard deviations derived from the curve fit.

#### Results

Figure 1A shows fluorescence traces from a series of sequential mixing stopped-flow experiments in which nAChR-rich membranes were preincubated with 3  $\mu\text{M}$  acetylcholine for the indicated times and then rapidly mixed with *Torpedo* physiologic solution containing 5 mM acetylcholine and 10  $\mu\text{M}$  Dns- $\text{C}_6\text{-Cho}$  (final concentrations after mixing). When nAChR membranes were preincubated with acetylcholine for periods that are too brief to allow significant desensitization to occur (*i.e.*, 15 ms), there was a large, approximately exponential increase in fluorescence on the time scale of tens of milliseconds upon mixing with the acetylcholine/Dns- $\text{C}_6\text{-Cho}$  solution. Nonrandom residuals indicated that there was also a slow linear fluorescence component. However, this linear component typically represented less than 10% of the trace and, therefore, was not analyzed in detail. Least-squares fitting of the entire fluorescence trace to an exponential equation with a linear component yielded an amplitude of 0.341 (arbitrary units) for the rapid fluorescent component (fig. 1). In experiments using longer preincubation times that permitted significant acetylcholine-induced nAChR desensitization to

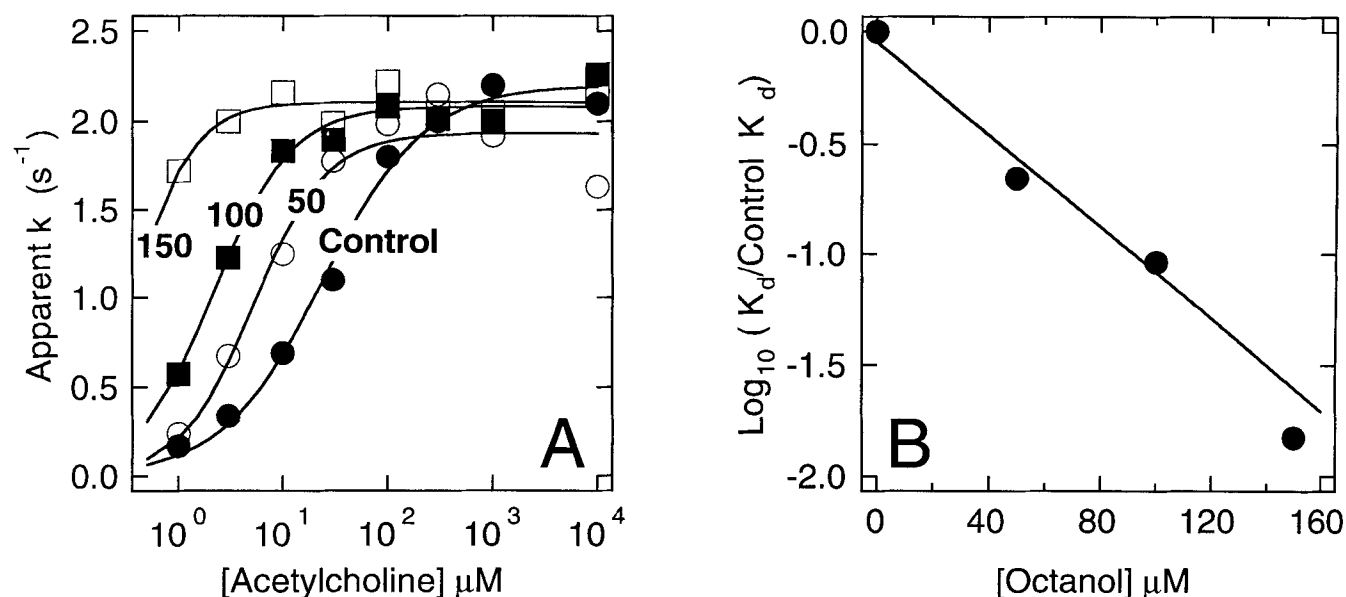

Fig. 2. The effect of octanol on acetylcholine concentration-response curves for desensitization. (A) The apparent rate of desensitization *versus* acetylcholine concentration is plotted using membranes that had been equilibrated with the indicated concentrations of octanol (in micromoles). The solid lines are fits of the apparent rate data to equation 1. Preequilibrating membranes with 50, 100, or 150  $\mu M$  octanol reduced the apparent  $K_d$  for desensitization to  $5 \pm 1 \mu M$ ,  $2.2 \pm 0.3 \mu M$ , or  $0.4 \pm 0.3 \mu M$ , respectively, from a control value of  $24 \pm 4 \mu M$ . The Hill coefficients ranged from 0.9 to 1.5, and the maximal rate of desensitization was approximately 2. (B) The logarithm of the normalized  $K_d$  is plotted as a function of octanol concentration. The solid line is a linear least-squares fit to the data obtained with 0, 50, and 100  $\mu M$  octanol. The 150- $\mu M$  point was not included in the fit because of the large uncertainty in its value. The slope of the line is  $-0.010 \pm 0.002 s^{-1} mM^{-1}$ .

occur before mixing with the Dns- $C_6$ -Cho/acetylcholine assay solution, the amplitude of the rapid fluorescence signal was smaller. Figure 1B plots the amplitude of this fluorescence signal as a function of acetylcholine-nAChOR preincubation time using acetylcholine concentrations of either 3  $\mu M$  or 1 mM during the preincubation period. The amplitude of the rapid fluorescence signal decreased exponentially with preincubation time, reflecting the process of agonist-induced desensitization. A fit of this amplitude data yielded apparent desensitization rates of  $0.34 \pm 0.02 s^{-1}$  or  $2.2 \pm 0.3 s^{-1}$  upon preincubation with 3  $\mu M$  or 1 mM acetylcholine, respectively.

Figure 2A shows the effect of octanol on the apparent rate of desensitization induced by preincubation with a range of acetylcholine concentrations. Both in the presence and absence of octanol, the apparent rate increased with acetylcholine concentration before reaching a plateau at high acetylcholine concentrations. At each octanol concentration, a plot of the apparent rate versus acetylcholine concentration was fit to equation 1. In the absence of octanol, this membrane preparation showed an apparent  $K_d$  for acetylcholine of  $24 \pm 4 \mu M$ , a maximal rate of desensitization of  $2.2 \pm 0.1 s^{-1}$ , and a Hill

coefficient of  $0.9 \pm 0.1$ . Octanol increased the apparent rate of desensitization induced by low concentrations of acetylcholine but had no significant effect on the apparent rate induced by high concentrations of acetylcholine. This resulted in a leftward shift in the acetylcholine concentration-response curve for desensitization that was octanol concentration-dependent. In the presence of 50  $\mu M$  octanol, the apparent  $K_d$  of acetylcholine was reduced to  $5 \pm 1 \mu M$ . By 150  $\mu M$ , octanol reduced the apparent  $K_d$  for acetylcholine to less than 1  $\mu M$ , the lowest acetylcholine concentration of agonist used in the assay. We did not determine the effect of octanol at concentrations greater than 150  $\mu M$  because at such high concentrations, octanol itself desensitized a significant fraction of the nAChORs, even in the absence of agonist. This was detected in experiments using a 15-ms preincubation period as a significant reduction in the amplitude of the rapid fluorescence signal in the presence of high octanol concentrations relative to that in the absence of octanol (data not shown). Figure 2B shows a plot of the logarithm of the normalized apparent  $K_d$  of acetylcholine as a function of octanol concentration and demonstrates that the apparent  $K_d$  of acetylcholine decreased approximately logarithmically with octa-

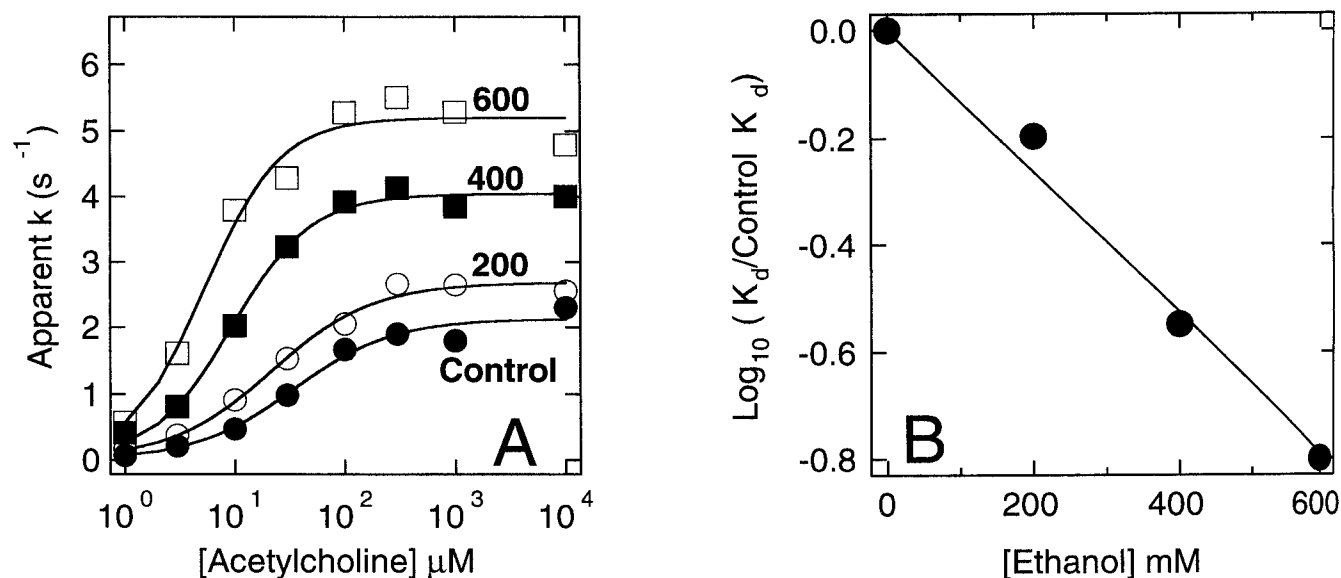

Fig. 3. The effect of ethanol on acetylcholine concentration-response curves for desensitization. (A) The apparent rate of desensitization *versus* acetylcholine concentration is plotted using membranes that had been equilibrated with the indicated concentrations of ethanol (in micromoles). The solid lines are fits of the apparent rate data to equation 1. Preequilibrating membranes with 200, 400, or 600 mM ethanol reduced the apparent  $K_d$  for desensitization to  $21 \pm 3 \mu M$ ,  $9.5 \pm 0.9 \mu M$ , or  $5.3 \pm 0.9 \mu M$ , respectively, from a control value of  $34 \pm 8 \mu M$ . The Hill coefficients ranged from 0.9 to 1.3. (B) The logarithm of the normalized apparent  $K_d$  is plotted as a function of ethanol concentration. The solid line is a linear least-squares fit to the data with a slope of  $-0.0014 \pm 0.0001 \text{ mM}^{-1}$ .

nol concentration. A linear fit of this data up to 100  $\mu M$  yielded a slope of  $-0.010 \pm 0.002/\mu M$ . Forman *et al.*<sup>31</sup> previously quantified the reduction in the apparent  $K_d$  for ion flux induced by short-chain n-alcohols by defining a parameter,  $SC_{50}$ , which is equal to the n-alcohol concentration that reduces the apparent  $K_d$  of acetylcholine for ion flux by half. In their studies, the apparent  $K_d$  also decreased logarithmically with ethanol concentration. We used an analogous treatment to the desensitization data in figure 2B and determined that the  $SC_{50}$  of octanol for desensitization (the concentration of octanol that reduces the apparent  $K_d$  for desensitization by half) was  $33 \pm 7 \mu M$ .

Figure 3A shows the effect of ethanol on acetylcholine concentration-response curves. Ethanol had two effects on acetylcholine-induced desensitization. As with octanol, ethanol reduced the apparent  $K_d$  of acetylcholine for desensitization in a concentration-dependent manner. By 600 mM ethanol, the highest concentration studied, the apparent  $K_d$  was reduced from a control value of  $34 \pm 8 \mu M$  to  $5.3 \pm 0.9 \mu M$ . Figure 3B plots the logarithm of the normalized apparent  $K_d$  of acetylcholine as a function of ethanol concentration. A linear fit of this data yielded a slope of  $-0.0014 \pm 0.0001 \text{ mM}^{-1}$  and, therefore, an  $SC_{50}$  for desensitization of  $220 \pm 15 \text{ mM}$ . In addition to reducing the apparent  $K_d$  of acetylcholine,

ethanol also significantly increased the maximal apparent desensitization rate induced by high acetylcholine concentrations. This maximal rate increased approximately linearly, with ethanol concentration from  $2.1 \pm 0.1 \text{ s}^{-1}$  (control) to  $5.2 \pm 0.4 \text{ s}^{-1}$  by 600 mM. The potency with which ethanol increased this rate was quantitated as the slope of a linear fit of a plot of the maximal apparent rate ( $k_{\text{max}}$  in equation 1) *versus* ethanol concentration (fig. 4). This fit indicated that the maximal apparent rate of desensitization increased by  $0.0053 \pm 0.0006 \text{ s}^{-1}$  for each millimole of ethanol, corresponding to a 48% increase in the maximal apparent rate at a concentration equal to the  $EC_{50}$  of ethanol for anesthesia in tadpoles (190 mM).

Butanol and hexanol behaved in a manner that was similar to ethanol in that they both reduced the apparent  $K_d$  of acetylcholine and increased the maximal apparent rate of desensitization (table 1). However, when normalized to its  $SC_{50}$  or *in vivo* anesthetic  $EC_{50}$ , it is apparent that hexanol increased the maximal apparent rate to a much lesser extent than either ethanol or butanol. Although heptanol substantially reduced the apparent  $K_d$  of acetylcholine, it did not increase the maximal apparent rate of desensitization, even at concentrations as high as 800  $\mu M$ . A plot of the maximal apparent rate of desensitization as a function of heptanol concentration

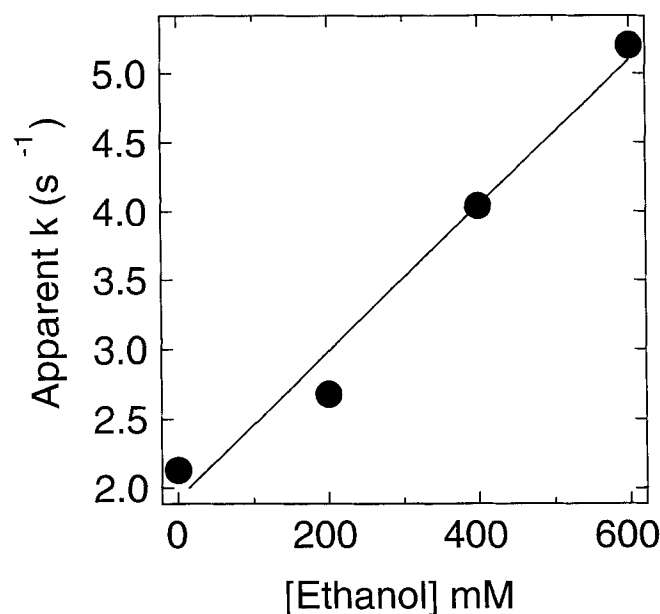

Fig. 4. The effect of ethanol on the maximal apparent rate at high acetylcholine concentrations. The maximal apparent rate increased linearly with ethanol concentration to a value of  $5.2 \pm 0.4 \text{ s}^{-1}$  by 600 mM. The line is a linear least-squares fit of the data yielding a slope of  $.0053 \pm 0.0006 \text{ s}^{-1} \text{ mM}^{-1}$ .

had a slope that was not significantly different from zero (table 1). At concentrations greater than 800  $\mu\text{M}$  heptanol, we could not reliably measure the apparent rate of acetylcholine-induced desensitization because heptanol itself desensitized a significant fraction of all receptors.

## Discussion

To our knowledge, this is the first study to define the alkyl chain-length dependence of the effects n-alcohols on the kinetics of agonist-induced desensitization of a ligand-gated ion channel. Our study demonstrates that n-alcohols as long as octanol increase the apparent rate of nAChOR desensitization induced by low concentrations of acetylcholine. The potencies with which n-alcohols act increases logarithmically with the addition of successive methylene groups and in proportion to their hydrophobicities and *in vivo* anesthetic potencies.<sup>32</sup> Our study also shows that short-chain n-alcohols increase the maximal rate of desensitization induced by high, receptor-saturating concentrations of agonist, whereas long-chain n-alcohols do not.

The effects of n-alcohols on the kinetics of agonist-induced nAChOR desensitization may be considered within the framework of a relatively simple scheme

describing the processes of agonist binding, channel opening, and receptor desensitization:

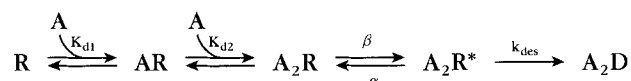

where R, AR, and  $\text{A}_2\text{R}$  are the unliganded, monoliganded, and doubly liganded (closed) resting states;  $\text{A}_2\text{R}^*$  is the ion permeable, open state; and  $\text{A}_2\text{D}$  is the desensitized state. The rate constant for resensitization of  $\text{A}_2\text{D}$  back to  $\text{A}_2\text{R}^*$  has been omitted because it is six orders of magnitude slower than the rate constant for desensitization.<sup>29</sup> The binding of two agonist molecules to unliganded resting state nAChORs rapidly leads to channel opening followed by desensitization. This scheme predicts that the apparent rate of desensitization will increase with agonist concentration before reaching a plateau at a value equal to the rate constant for desensitization ( $k_{\text{des}}$ ). Previous ion flux studies have estimated the rate constant for desensitization to be in the range of  $2\text{--}7 \text{ s}^{-1}$ .<sup>33–35</sup>

Rapid quenched-flow studies have shown that ethanol and butanol reduce the apparent  $K_d$  of acetylcholine for ion flux. The concentrations of ethanol and butanol that reduce the apparent  $K_d$  of acetylcholine for ion flux by half are 270 mM and 17 mM, respectively.<sup>21</sup> Our study shows that 220 mM ethanol and 16 mM butanol reduce the apparent  $K_d$  of acetylcholine for desensitization by half (table 1). The most economical explanation for the near identity in n-alcohol potency for enhancing agonist-induced ion flux and desensitization is that n-alcohols reduce the apparent  $K_d$ s for both channel activation and desensitization by acting at a common kinetic step(s), and that the primary pathway to the desensitized state in the presence of these n-alcohols remains *via* the doubly liganded open-channel state as depicted in scheme 1. The effect of ethanol and butanol on the apparent  $K_d$ s of acetylcholine for ion flux and desensitization may reflect an increase in either the microscopic affinity for agonist or the open/closed equilibrium ( $\beta/\alpha$ ). Our data do not allow us to distinguish between these two possibilities; however, quenched-flow studies indicate that ethanol increases the apparent agonist affinity for channel activation primarily by modifying the equilibrium between open and closed states.<sup>36</sup> More specifically, single-channel studies using nAChORs expressed in BC3H1 cells suggest that butanol increases the opening rate constant,  $\beta$ .<sup>20</sup> From the onset of the current response to the rapid application of acetylcholine, Liu *et al.*<sup>20</sup> concluded that

**Table 1. Effect of n-Alcohols on the Apparent  $K_D$  of Acetylcholine and the Maximal Rate of Acetylcholine-induced Desensitization**

| n-Alcohol | EC <sub>50</sub> for Anesthesia*<br>(mM) | SC <sub>50</sub> †<br>(mM) | Increase in $k_{max}$ ‡<br>(s <sup>-1</sup> mM <sup>-1</sup> ) | Increase in $k_{max}$ at the<br>SC <sub>50</sub> Concentration§<br>(s <sup>-1</sup> ) | Concentrations Studied<br>(mM) |
|-----------|------------------------------------------|----------------------------|----------------------------------------------------------------|---------------------------------------------------------------------------------------|--------------------------------|
| Ethanol   | 190 ± 41                                 | 220 ± 15                   | 0.0053 ± 0.0006                                                | 1.2                                                                                   | 200, 400, 600                  |
| Butanol   | 10.8 ± 0.77                              | 16 ± 1                     | 0.09 ± 0.01                                                    | 1.4                                                                                   | 10, 20, 40                     |
| Hexanol   | 0.57 ± 0.037                             | 0.34 ± 0.07                | 0.66 ± 0.08                                                    | 0.22                                                                                  | 0.5, 1.0, 1.5                  |
| Heptanol  | 0.23 ± 0.011                             | 0.15 ± 0.03                | 0.4 ± 0.4                                                      | 0.06                                                                                  | 0.3, 0.4, 0.6, 0.8             |
| Octanol   | 0.057 ± 0.0025                           | 0.033 ± 0.007              | -1 ± 1                                                         | -0.03                                                                                 | 0.05, 0.1, 0.15                |

\* Righting reflex in tadpoles from Alifimoff *et al.*<sup>17</sup>

† Concentration of n-alcohol that reduces the apparent  $K_D$  for desensitization by half. The SC<sub>50</sub> for each n-alcohol was derived from a linear fit of a plot of the logarithm of the apparent  $K_D$  versus n-alcohol concentration. The errors were obtained from the fit.

‡ Slope of a plot of the maximal rate of desensitization versus n-alcohol concentration. For each n-alcohol, the slope was derived from a linear fit of a plot of the maximal rate of desensitization from equation 1 versus n-alcohol concentration. The errors were obtained from the fit.

§ Equal to  $k_{max} \times SC_{50}$  concentration.

20 mM butanol increased  $\beta$  by approximately twofold. Within the context of scheme 1, this action alone will quantitatively account for the twofold reduction in the apparent  $K_d$ s of acetylcholine for desensitization and ion flux, as well as the doubling of the single-channel burst frequency in the presence of low concentrations of acetylcholine induced by 20 mM butanol.

In view of previous rapid quenched-flow studies indicating that n-alcohols longer than butanol have no effect on the apparent agonist affinity of the nAChR, we were surprised to observe that long-chain n-alcohols significantly reduced the apparent  $K_d$  of acetylcholine for desensitization. One possible explanation for this apparent discrepancy is that long-chain n-alcohols potentiate agonist-induced desensitization *via* kinetic pathways not described by scheme 1 (*i.e.*, that do not pass through the open-channel state). However, because the potencies with which long-chain n-alcohols reduce the apparent  $K_d$  of acetylcholine for desensitization may be reasonably predicted simply by extrapolating the potencies of short-chain n-alcohols (potency increases smoothly in a logarithmic manner with alkyl chain length upon ascending the series from ethanol to octanol), it seems unlikely that the underlying kinetic mechanism by which short- and long-chain n-alcohols alter the apparent affinity of acetylcholine is different. Alternatively, quenched-flow studies use a protocol in which agonist and n-alcohols are added simultaneously to receptor membranes to minimize n-alcohol-induced passive ion leak across synaptosomes. Conceivably, the simultaneous addition of agonist and n-alcohol may not allow long-chain n-alcohols, which are present at micromolar concentrations, to fully equilibrate with their sites of action and exert their maximal potentiating effects on the time frame of the assay. In addition, any increase in

the apparent agonist affinity of nAChR may be difficult to detect in ion flux studies because these n-alcohols also block flux through open channels. In support of this suggestion, when Liu *et al.*<sup>20</sup> used nAChRs that had been equilibrated with n-alcohols, they observed that n-alcohols as long as decanol increased single-channel burst frequency in the presence of 0.2  $\mu$ M acetylcholine and concluded that this was consistent with an increase in the apparent affinity of acetylcholine for nAChR activation. In fact, figure 5 demonstrates that the con-

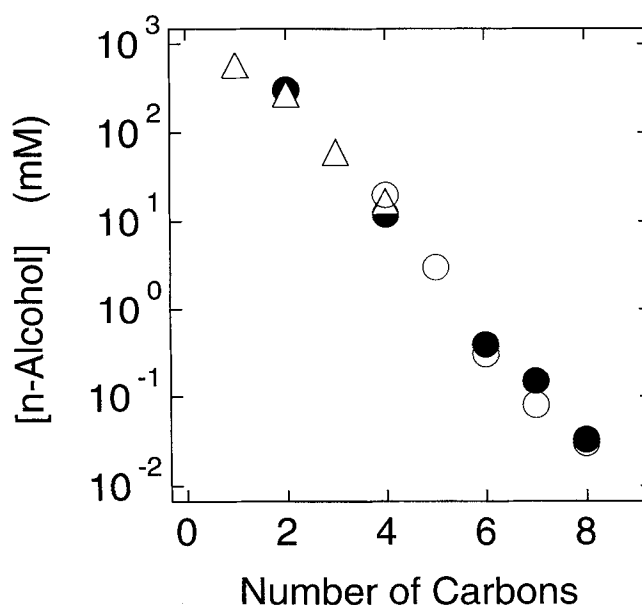

**Fig. 5.** Alkyl chain-length dependence of the concentration of n-alcohol that (1) reduces the apparent  $K_d$  of acetylcholine for desensitization by half (●), (2) reduces the apparent  $K_d$  of acetylcholine for ion flux by half (△),<sup>21</sup> and (3) doubles the frequency of bursts in single-channel recording of nAChRs in the presence of 0.2  $\mu$ M acetylcholine (○).<sup>20</sup>

centrations of n-alcohols that double the single-channel burst frequency of nAChOR in the presence of 0.2  $\mu\text{M}$  acetylcholine agree closely with our  $\text{SC}_{50}$  values for desensitization, strongly suggesting that desensitization proceeds primarily *via* the open (albeit n-alcohol-blocked) state even in the presence of long-chain n-alcohols.

It has been reported, and our study confirms, that ethanol increases the maximal apparent rate of desensitization induced by saturating concentrations of agonist.<sup>31</sup> Within the context of scheme 1, this reflects an increase in the rate constant for desensitization ( $k_{\text{des}}$ ). Our study shows that butanol and hexanol also increase the rate constant for desensitization. Of note, when each n-alcohol is normalized to its  $\text{SC}_{50}$ , hexanol is noted to be significantly less potent than either ethanol or butanol (table 1). The potency with which these n-alcohols enhance this rate constant increases approximately logarithmically with alkyl chain length. From this logarithmic trend, we would predict that heptanol and octanol should increase the rate constant by 2.5  $\text{s}^{-1} \text{mM}^{-1}$  and 8.5  $\text{s}^{-1} \text{mM}^{-1}$ , respectively. However, neither of these n-alcohols increased this rate constant, even at concentrations that (1) are predicted to do so by extrapolation of the potencies of shorter-chain n-alcohols, and (2) cause a large decrease in the apparent affinity of acetylcholine. In fact, even concentrations of heptanol and octanol that approach those that directly desensitize receptors (in the absence of agonist) produced no increase in the rate constant for desensitization.

Although our functional studies do not address specifically the question of whether the effects of n-alcohols on desensitization kinetics reflect a primary protein or lipid site of action, it has been suggested that cutoff may reflect the inability of long-chain n-alcohols to fit completely within a hydrophobic protein pocket.<sup>25,37</sup> Within the context of such theories, the observation that the n-alcohol effect on the rate constant for desensitization shows cutoff between hexanol and heptanol, whereas the effect on the apparent agonist affinity continues at least to octanol, suggests that these two kinetically distinct effects on nAChOR may be modulated by physically distinct sites that have different steric constraints; the site(s) responsible for increasing the rate constant for desensitization are predicted to be smaller than those that increase agonist affinity. Although the locations of such protein sites have not yet been defined, it is tempting to speculate that the smaller sites might be located within the confined spaces between hydrophobic membrane-spanning domains, whereas larger sites might be

at the protein-lipid or protein-water interfaces. Ultimately, studies that use n-alcohols that are able to be photoactivated and conformationally restricted cyclic alcohols may help to define both the location and dimensions of putative receptor sites.

The authors thank Dr. Keith W. Miller for his helpful discussions during the preparation of this manuscript.

## References

1. Stroud RM, McCarthy MP, Shuster M: Nicotinic acetylcholine receptor superfamily of ligand-gated ion channels. *Biochemistry* 1990; 29:11009-23
2. Changeux JP: The TiPS lecture. The nicotinic acetylcholine receptor: An allosteric protein prototype of ligand-gated ion channels. *Trends Pharmacol Sci* 1990; 11:485-92
3. Ortells MO, Lunt GG: Evolutionary history of the ligand-gated ion-channel superfamily of receptors. *Trends Neurosci* 1995; 18:121-7
4. Franks NP, Lieb WR: Molecular and cellular mechanisms of general anaesthesia. *Nature* 1994; 367:607-14
5. Toyoshima C, Unwin N: Three-dimensional structure of the acetylcholine receptor by cryoelectron microscopy and helical image reconstruction. *J Cell Biol* 1990; 111:2623-35
6. Unwin N: Acetylcholine receptor channel imaged in the open state. *Nature* 1995; 373:37-43
7. White BH, Cohen JB: Agonist-induced changes in the structure of the acetylcholine receptor M2 regions revealed by photoincorporation of an uncharged nicotinic noncompetitive antagonist. *J Biol Chem* 1992; 267:15770-83
8. Cohen JB, Sharp SD, Liu WS: Structure of the agonist-binding site of the nicotinic acetylcholine receptor. [3H]acetylcholine mustard identifies residues in the cation-binding subsite. *J Biol Chem* 1991; 266:23354-64
9. Sine SM, Claudio T, Sigworth FJ: Activation of *Torpedo* acetylcholine receptors expressed in mouse fibroblasts. Single channel current kinetics reveal distinct agonist binding affinities. *J Gen Physiol* 1990; 96:395-437
10. Neubig RR, Boyd ND, Cohen JB: Conformations of *Torpedo* acetylcholine receptor associated with ion transport and desensitization. *Biochemistry* 1982; 21:3460-7
11. Dilger JP, Liu Y: Desensitization of acetylcholine receptors in BC3H-1 cells. *Pflugers Arch* 1992; 420:479-85
12. Raines DE, Rankin SE, Miller KW: General anesthetics modify the kinetics of nicotinic acetylcholine receptor desensitization at clinically relevant concentrations. *ANESTHESIOLOGY* 1995; 82:276-87
13. Jones MV, Westbrook GL: Desensitized states prolong GABAA channel responses to brief agonist pulses. *Neuron* 1995; 15:181-91
14. Jones MV, Westbrook GL: The impact of receptor desensitization on fast synaptic transmission. *Trends Neurosci* 1996; 19:96-101
15. Parsons CG, Zong X, Lux HD: Whole cell and single channel analysis of the kinetics of glycine-sensitive *N*-methyl-D-aspartate receptor desensitization. *Br J Pharmacol* 1993; 109:213-21
16. Yakel JL, Shao XM, Jackson MB: Activation and desensitization of the 5-HT<sub>3</sub> receptor in a rat glioma  $\times$  mouse neuroblastoma hybrid cell. *J Physiol (Lond)* 1991; 436:293-308
17. Alifimoff JK, Firestone LL, Miller KW: Anaesthetic potencies of



primary alkanols: Implications for the molecular dimensions of the anaesthetic site. *Br J Pharmacol* 1989; 96:9-16

18. Murrell RD, Haydon DA: Actions of n-alcohols on nicotinic acetylcholine receptor ion channels in cultured rat muscle cells. *Ann NY Acad Sci* 1991; 625:365-74

19. Machu TK, Harris RA: Alcohols and anesthetics enhance the function of 5-hydroxytryptamine<sub>3</sub> receptors expressed in *Xenopus laevis* oocytes. *J Pharmacol Exp Ther* 1994; 271:898-905

20. Liu Y, Dilger JP, Vidal AM: Effects of alcohols and volatile anesthetics on the activation of nicotinic acetylcholine receptor channels. *Mol Pharmacol* 1994; 45:1235-41

21. Wood SC, Forman SA, Miller KW: Short chain and long chain alkanols have different sites of action on nicotinic acetylcholine receptor channels from *Torpedo*. *Mol Pharmacol* 1991; 39:332-8

22. Wood SC, Hill WA, Miller KW: Cycloalkanemethanols discriminate between volume- and length-dependent loss of activity of alkanols at the *Torpedo* nicotinic acetylcholine receptor. *Mol Pharmacol* 1993; 44:1219-26

23. Forman SA, Miller KW, Yellen G: A discrete site for general anesthetics on a postsynaptic receptor. *Mol Pharmacol* 1995; 48:574-81

24. Jenkins A, Franks NP, Lieb WR: Actions of general anaesthetics on 5-HT<sub>3</sub> receptors in N1E-115 neuroblastoma cells. *Br J Pharmacol* 1996; 117:1507-15

25. Franks NP, Lieb WR: Mapping of general anaesthetic target sites provides a molecular basis for cutoff effects. *Nature* 1985; 316:349-51

26. Curry S, Moss GW, Dickinson R, Lieb WR, Franks NP: Probing the molecular dimensions of general anaesthetic target sites in tadpoles (*Xenopus laevis*) and model systems using cycloalcohols. *Br J Pharmacol* 1991; 102:167-73

27. Waksman G, Fournie ZMC, Roques B: Synthesis of fluorescent acylcholines with agonist properties: Pharmacological activity on *Electrophorus* electroplaque and interaction *in-vitro* with *Torpedo* receptor-rich membrane fragments. *Febs Lett* 1976; 67:335-42

28. Braswell LM, Miller KW, Sauter JF: Pressure reversal of the action of octanol on postsynaptic membranes from *Torpedo*. *Br J Pharmacol* 1984; 83:305-11

29. Raines DE, Krishnan NS: Transient low-affinity agonist binding to *Torpedo* postsynaptic membranes resolved by using sequential mixing stopped-flow fluorescence spectroscopy. *Biochemistry* 1998; 37:956-64

30. Raines DE, Zachariah VZ: Isoflurane increases the apparent agonist affinity of the nicotinic acetylcholine receptor. *ANESTHESIOLOGY* 1999; 90:135-46

31. Forman SA, Righi DL, Miller KW: Ethanol increases agonist affinity for nicotinic receptors from *Torpedo*. *Biochim Biophys Acta* 1989; 987:95-103

32. Firestone LL, Miller JC, Miller KW: Table of physical and pharmacological properties of anesthetics, in *Molecular and Cellular Mechanisms of Anesthetics*. Edited by Roth SH, Miller KW. New York, Plenum Press, 1986, pp 455-70

33. Walker JW, Takeyasu K, McNamee MG: Activation and inactivation kinetics of *Torpedo californica* acetylcholine receptor in reconstituted membranes. 1982; 21:5384-9

34. Takeyasu K, Shiono S, Udgaonkar JB, Fujita N, Hess GP: Acetylcholine receptor: Characterization of the voltage-dependent regulatory (inhibitory) site for acetylcholine in membrane vesicles from *Torpedo californica* electroplax. *Biochemistry* 1986; 25:1770-6

35. Forman SA, Miller KW: High acetylcholine concentrations cause rapid inactivation before fast desensitization in nicotinic acetylcholine receptors from *Torpedo*. *Biophys J* 1988; 54:149-58

36. Wu G, Tonner PH, Miller KW: Ethanol stabilizes the open channel state of the *Torpedo* nicotinic acetylcholine receptor. *Mol Pharmacol* 1994; 45:102-8

37. Curry S, Lieb WR, Franks NP: Effects of general anesthetics on the bacterial luciferase enzyme from *Vibrio harveyi*: An anesthetic target site with differential sensitivity. *Biochemistry* 1990; 29:4641-52
